# Supplementary material
Source: PubMed Central journal article supplement (PMC2656387)
Supplement: NIHMS87362-supplement-Suppl_Table_1.pdf [file NIHMS87362-supplement-Suppl_Table_1.pdf]

**Supplemental Table 1. Evoked input (EI) and percentage evoked input (%EI) from each cortical layer for all the cell types examined**

| Excitatory Input |  |             |             |             |            |             |             |             |            |              |            |
|------------------|--|-------------|-------------|-------------|------------|-------------|-------------|-------------|------------|--------------|------------|
|                  |  | L2/3        |             | L4          |            | L5a         |             | L5b         |            | L6           |            |
|                  |  | EI          | %EI         | EI          | %EI        | EI          | %EI         | EI          | %EI        | EI           | %EI        |
| Py (n = 10)      |  | 4.34 ± 0.50 | 30.0 ± 2.9  | 5.48 ± 0.96 | 34.1 ± 2.4 | 4.26 ± 0.99 | 24.4 ± 0.04 | 1.19 ± 0.48 | 7.0 ± 2.1  | 0.60 ± 0.11  | 4.5 ± 0.8  |
| FS (12)          |  | 5.93 ± 0.43 | 34.5 ± 3.0  | 7.53 ± 1.08 | 39.9 ± 3.0 | 2.55 ± 0.37 | 14.4 ± 2.0  | 1.93 ± 0.36 | 10.3 ± 1.8 | 0.15 ± 0.13  | 0.9 ± 0.9  |
| MC+ (25)         |  | 7.07 ± 0.61 | 73.2 ± 2.8  | 1.83 ± 0.33 | 16.8 ± 1.9 | 0.77 ± 0.21 | 5.9 ± 1.3   | 0.40 ± 0.09 | 4.4 ± 1.2  | -0.01 ± 0.06 | -0.3 ± 0.8 |
| MC- (18)         |  | 4.86 ± 0.51 | 48.3 ± 4.2  | 3.88 ± 0.48 | 36.6 ± 3.1 | 0.87 ± 0.29 | 7.1 ± 1.8   | 0.51 ± 0.13 | 4.5 ± 1.0  | 0.38 ± 0.10  | 3.5 ± 0.9  |
| IS (11)          |  | 3.18 ± 0.50 | 40.2 ± 3.2  | 1.05 ± 0.33 | 13.7 ± 3.2 | 2.58 ± 0.42 | 35.2 ± 3.8  | 0.50 ± 0.13 | 8.4 ± 1.8  | 0.16 ± 0.07  | 2.48 ± 1.5 |
| RS (7)           |  | 2.50 ± 0.32 | 36.5 ± 6.5  | 1.29 ± 0.28 | 16.3 ± 2.9 | 2.76 ± 0.67 | 32.1 ± 6.2  | 1.18 ± 0.31 | 13.4 ± 2.6 | 0.16 ± 0.07  | 1.8 ± 0.7  |
| BS (8)           |  | 2.72 ± 0.38 | 74.7 ± 12.2 | 0.62 ± 0.18 | 14.2 ± 4.7 | 0.53 ± 0.35 | 2.0 ± 8.0   | 0.29 ± 0.08 | 6.5 ± 1.3  | 0.10 ± 0.05  | 2.6 ± 1.0  |
| Bipolar (5)      |  | 3.31 ± 1.39 | 33.8 ± 7.3  | 3.26 ± 1.14 | 39.4 ± 6.4 | 1.05 ± 0.30 | 14.0 ± 1.6  | 0.79 ± 0.28 | 10.0 ± 2.7 | 0.20 ± 0.12  | 2.8 ± 1.5  |
| Chandellier (3)  |  | 4.22 ± 1.06 | 43.8 ± 10.5 | 1.96 ± 1.01 | 17.9 ± 5.6 | 3.36 ± 1.42 | 27.9 ± 4.4  | 1.15 ± 0.77 | 8.3 ± 3.6  | 0.29 ± 0.24  | 2.1 ± 1.3  |
| NG (4)           |  | 3.05 ± 0.29 | 42.7 ± 3.9  | 1.41 ± 0.33 | 19.4 ± 3.9 | 1.85 ± 0.39 | 25.4 ± 4.7  | 0.77 ± 0.07 | 11.0 ± 1.4 | 0.10 ± 0.09  | 1.6 ± 1.2  |

| Inhibitory Input |  |             |             |             |             |              |             |              |             |             |             |             |            |
|------------------|--|-------------|-------------|-------------|-------------|--------------|-------------|--------------|-------------|-------------|-------------|-------------|------------|
|                  |  | L1          |             | L2/3        |             | L4           |             | L5a          |             | L5b         |             | L6          |            |
|                  |  | EI          | %EI         | EI          | %EI         | EI           | %EI         | EI           | %EI         | EI          | %EI         | EI          | %EI        |
| Py (7)           |  | 3.44 ± 0.65 | 36.6 ± 5.8  | 4.20 ± 0.37 | 47.0 ± 3.8  | 0.54 ± 0.34  | 5.8 ± 3.8   | -0.12 ± 0.33 | -2.7 ± 4.4  | 0.44 ± 0.33 | 4.7 ± 3.7   | 0.76 ± 0.38 | 8.6 ± 3.8  |
| FS (11)          |  | 0.75 ± 0.40 | 4.5 ± 5.1   | 4.25 ± 0.45 | 59.5 ± 9.7  | 3.01 ± 0.79  | 28.8 ± 7.2  | -0.04 ± 0.23 | -5.3 ± 5.5  | 0.07 ± 0.19 | 2.7 ± 3.2   | 0.53 ± 0.21 | 9.8 ± 4.0  |
| MC+ (9)          |  | 1.46 ± 0.81 | 5.7 ± 7.0   | 4.46 ± 1.26 | 30.0 ± 7.6  | 2.85 ± 1.56  | 20.3 ± 5.9  | 1.66 ± 0.78  | 12.7 ± 5.3  | 1.81 ± 0.40 | 22.9 ± 6.8  | 0.74 ± 0.25 | 8.5 ± 2.6  |
| MC- (6)          |  | 0.18 ± 0.26 | 9.6 ± 9.2   | 3.54 ± 1.18 | 29.4 ± 8.1  | 4.29 ± 1.55  | 33.3 ± 3.4  | 3.17 ± 1.83  | 9.4 ± 15.3  | 1.31 ± 0.51 | 12.8 ± 4.9  | 0.47 ± 0.17 | 5.5 ± 1.6  |
| IS (9)           |  | 1.61 ± 0.58 | 21.2 ± 5.0  | 3.09 ± 0.36 | 38.1 ± 4.0  | 0.23 ± 0.17  | 2.4 ± 1.9   | 1.31 ± 0.37  | 17.0 ± 3.9  | 1.38 ± 0.41 | 16.3 ± 4.5  | 0.55 ± 0.24 | 5.0 ± 2.2  |
| RS (6)           |  | 0.91 ± 0.49 | 5.9 ± 8.9   | 3.69 ± 0.89 | 59.9 ± 13.4 | 0.89 ± 0.36  | 10.3 ± 2.8  | 0.76 ± 0.70  | 4.2 ± 7.5   | 0.64 ± 0.44 | 12.5 ± 6.4  | 0.41 ± 0.15 | 7.2 ± 2.2  |
| BS (9)           |  | 1.37 ± 0.68 | 17.2 ± 6.6  | 2.79 ± 0.27 | 48.4 ± 4.1  | 0.39 ± 0.13  | 6.4 ± 1.8   | 0.57 ± 0.26  | 6.5 ± 3.4   | 0.78 ± 0.27 | 12.7 ± 3.7  | 0.44 ± 0.15 | 8.8 ± 3.4  |
| Bipolar (4)      |  | 0.95 ± 0.45 | 6.2 ± 1.3   | 4.23 ± 2.95 | 24.1 ± 10.4 | 3.11 ± 2.05  | 21.5 ± 10.8 | 3.42 ± 1.07  | 22.1 ± 2.1  | 2.69 ± 1.44 | 20.6 ± 11.2 | 0.50 ± 0.24 | 5.5 ± 2.9  |
| Chandellier (4)  |  | 1.88 ± 0.72 | 26.5 ± 3.4  | 4.45 ± 1.26 | 67.9 ± 11.2 | -0.17 ± 0.30 | -2.5 ± 5.6  | -0.63 ± 0.45 | -16.2 ± 9.7 | 0.78 ± 0.19 | 13.9 ± 4.1  | 0.57 ± 0.15 | 10.4 ± 3.9 |
| NG (4)           |  | 1.19 ± 0.78 | 16.3 ± 10.0 | 3.53 ± 0.85 | 67.8 ± 11.1 | 0.26 ± 0.24  | 3.4 ± 3.9   | -0.15 ± 0.27 | -1.9 ± 6.8  | 0.14 ± 0.14 | 0.9 ± 3.4   | 0.62 ± 0.09 | 13.6 ± 4.7 |

Evoked input (EI) is expressed in units of pA, calculated by subtracting the mean spontaneous currents from the mean currents measured following photostimulation in the analysis window of 150 ms for all stimulation sites in each layer. Percentage evoked input (%EI) denotes the average input of each layer as a percentage of the summed input from all the layers examined. The blue numbers indicate statistical significance ( $p < 0.05$ ) in paired t-tests between average current amplitudes of control and photostimulation conditions at each layer for the sampled cells. The red numbers indicate statistical insignificance. Please note that all the negative values are not statistically significant. Numbers in parentheses indicate numbers of cells sampled for each cell type.

Py: pyramidal cell; FS: fast spiking cell; MC+: SOM+/CR+ Martinotti cell; MC-: SOM+/CR- Martinotti cell; IS: multipolar irregular spiking cell; RS: multipolar regular spiking cell; BS: multipolar burst spiking cell; Bipolar: bipolar cell; Chandellier: chandellier cell; NG: neurogliaform cell.
