# Supplementary material
Source: PubMed Central journal article supplement (PMC2656387)

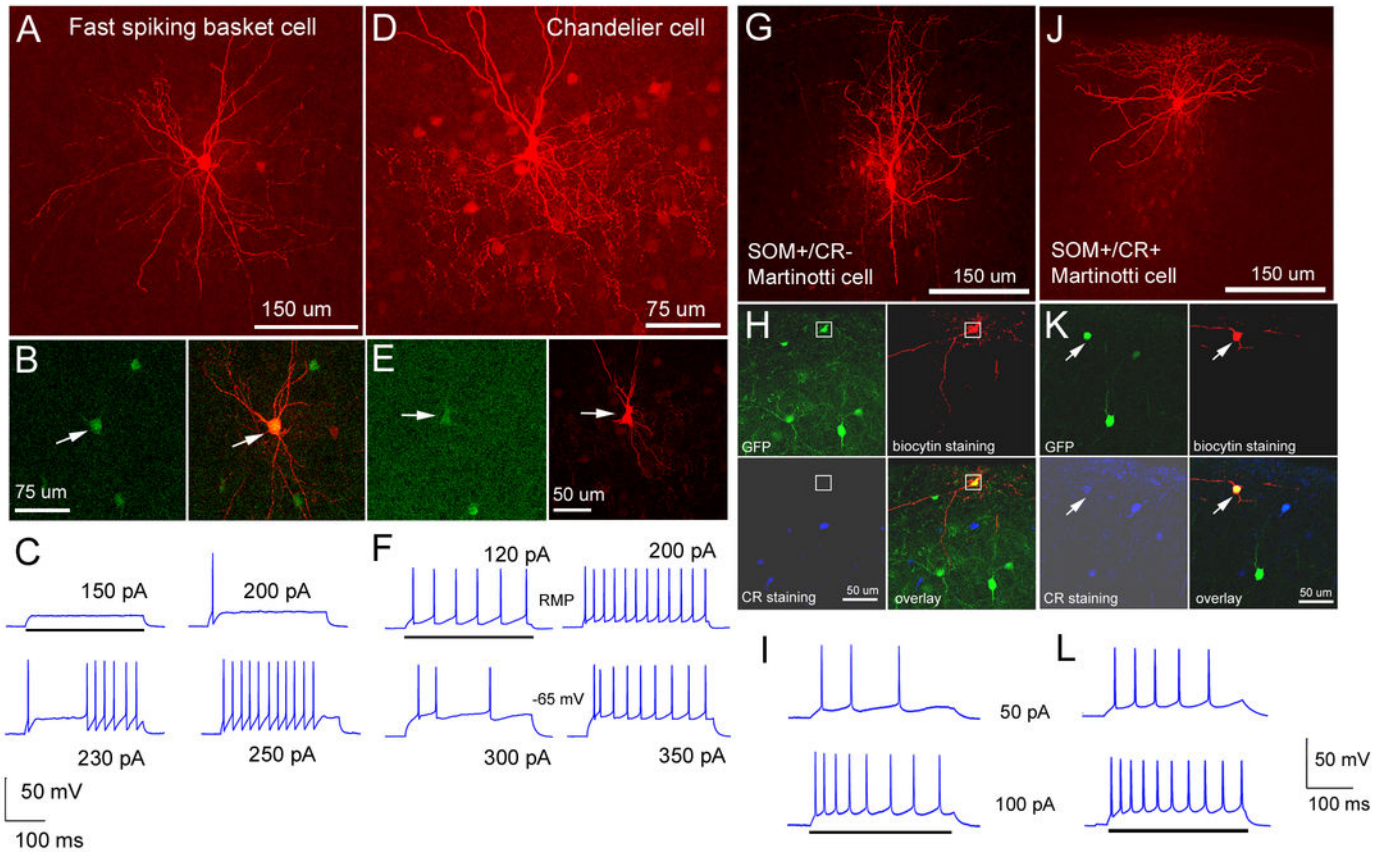

Supplement: NIHMS87362-supplement-Suppl_Fig_1.pdf [file NIHMS87362-supplement-Suppl_Fig_1.pdf]

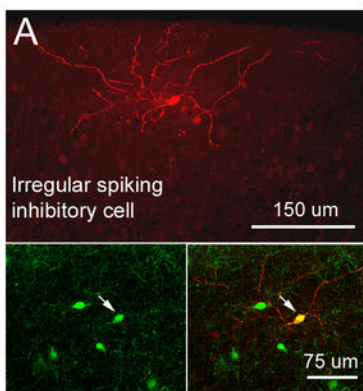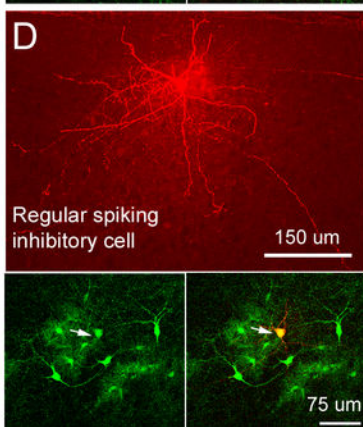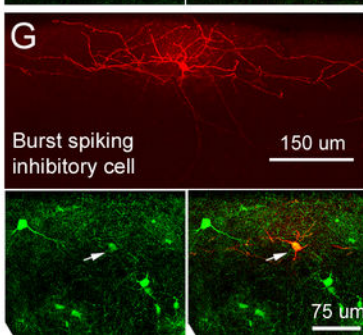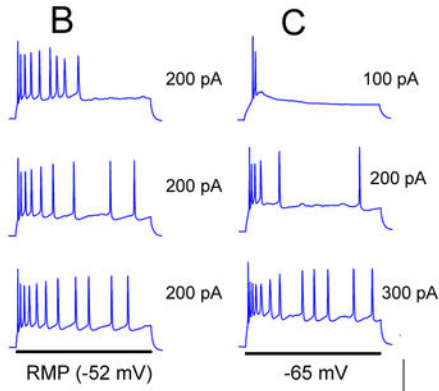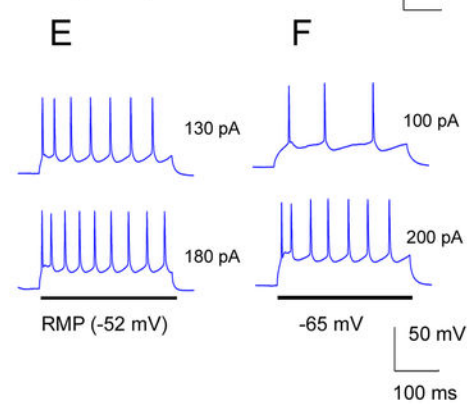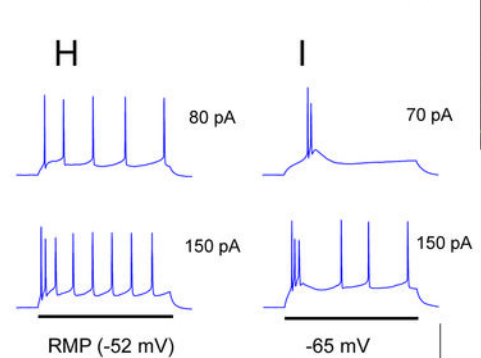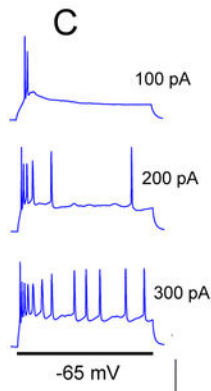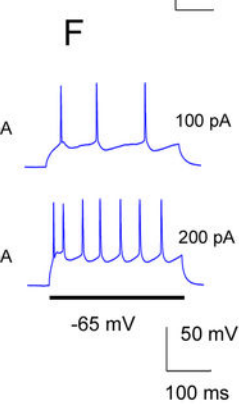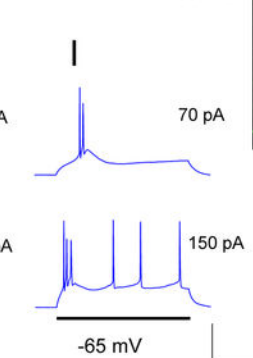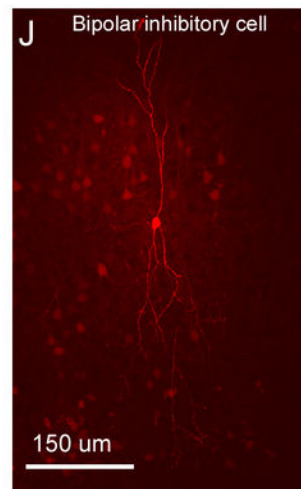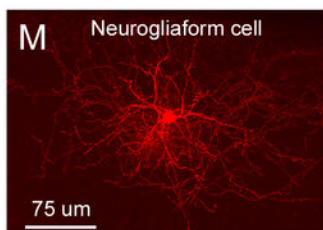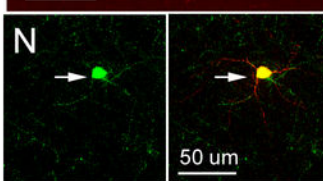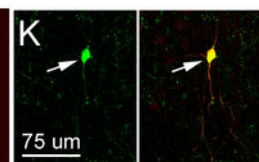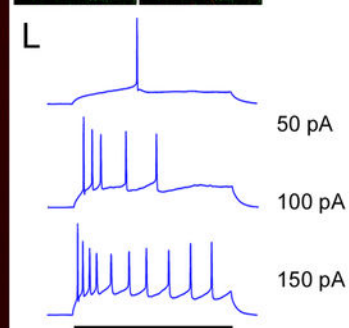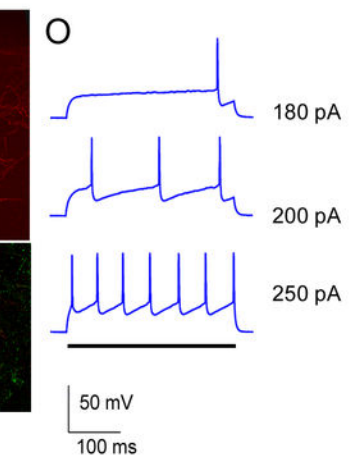

Supplement: NIHMS87362-supplement-Suppl_Fig_2.pdf [file NIHMS87362-supplement-Suppl_Fig_2.pdf]

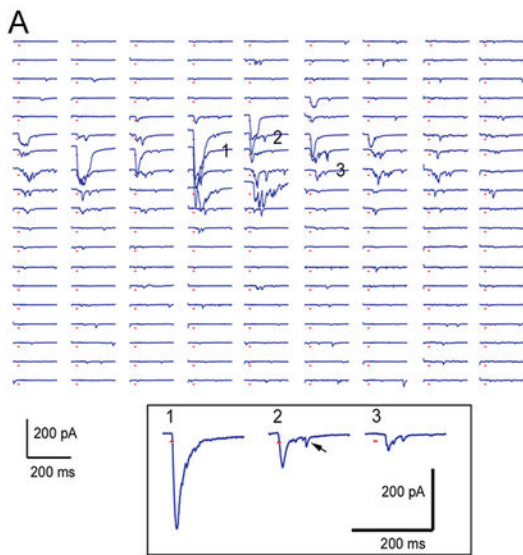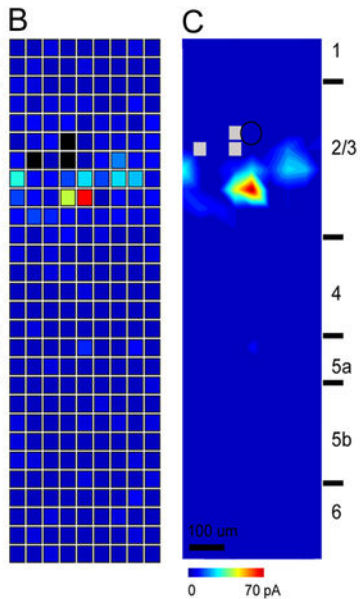

A-D: excitatory input maps and analyses

E-G: inhibitory input maps and analyses

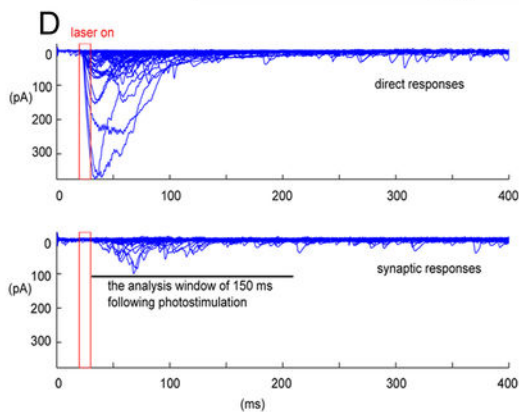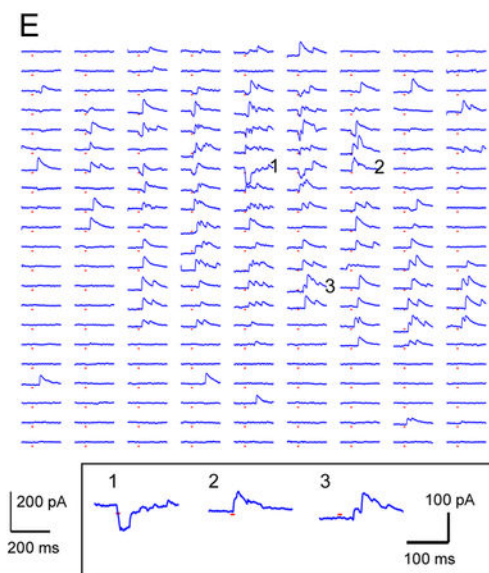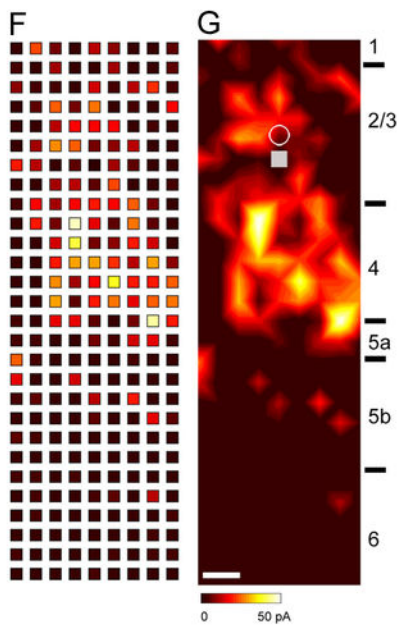

Supplement: NIHMS87362-supplement-Suppl_Fig_3.pdf [file NIHMS87362-supplement-Suppl_Fig_3.pdf]

A

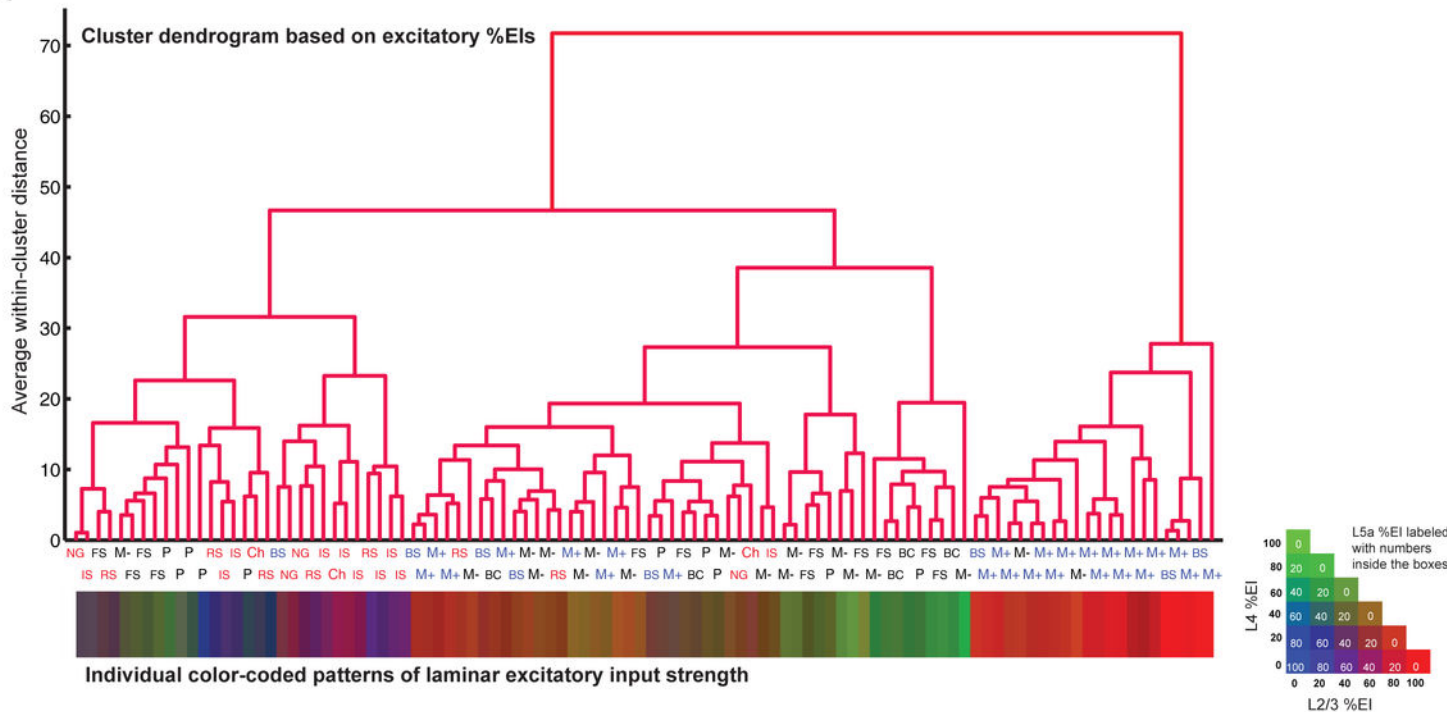

B

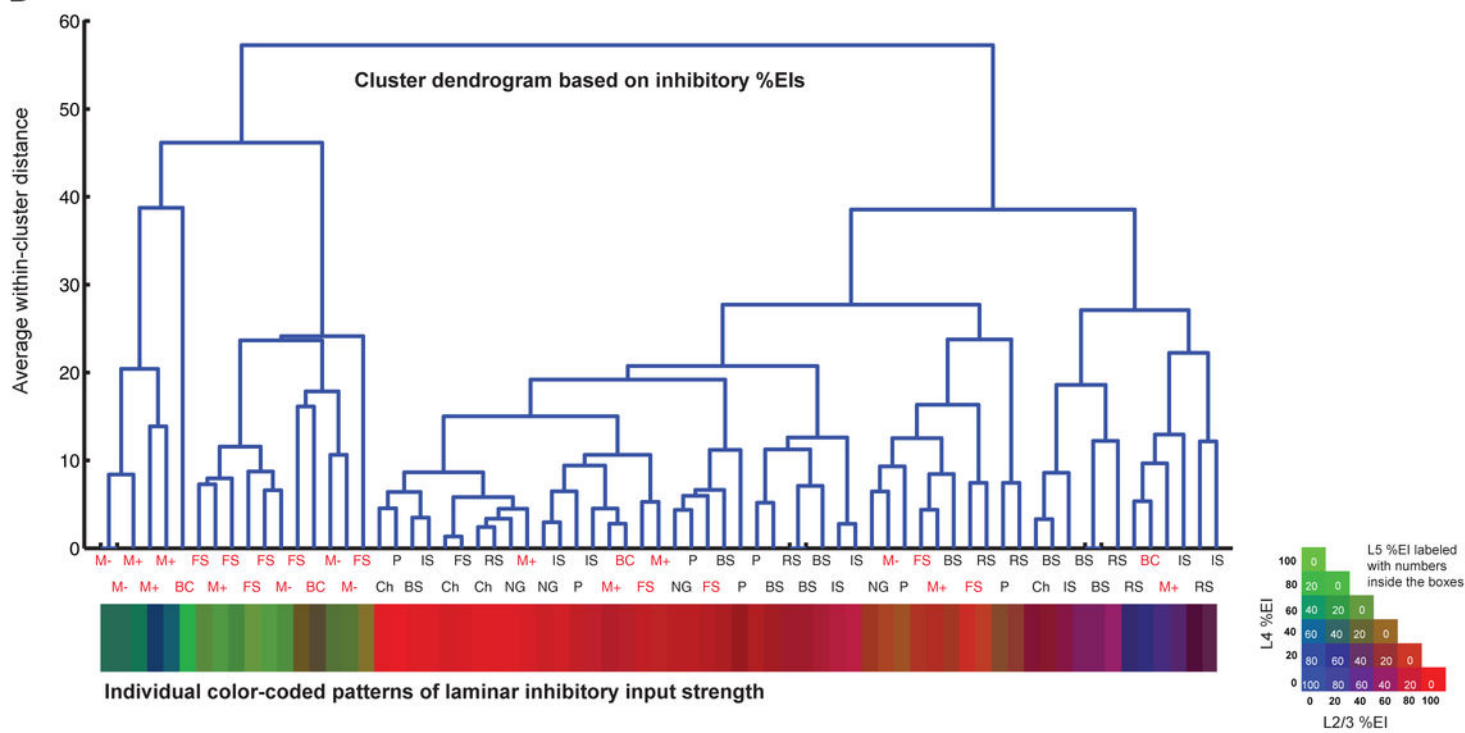

Supplement: NIHMS87362-supplement-Suppl_Fig_4.pdf [file NIHMS87362-supplement-Suppl_Fig_4.pdf]

## Spatial resolution of laser scanning photostimulation

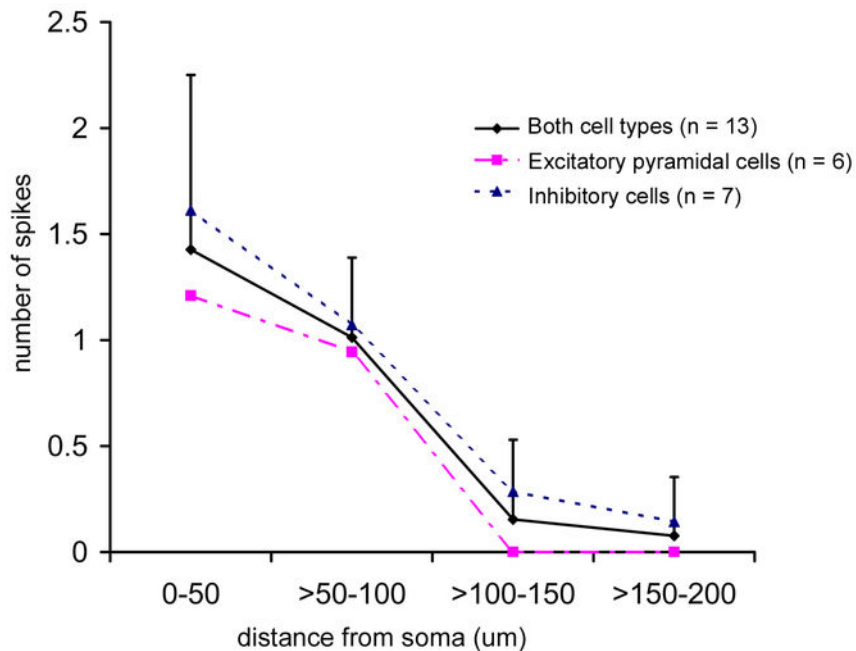

Supplement: NIHMS87362-supplement-Suppl_Fig_5.pdf [file NIHMS87362-supplement-Suppl_Fig_5.pdf]
